# Supplementary material for: Usefulness and Limitations of Anti-S IgG Assay in Detecting Previous SARS-CoV-2 Breakthrough Infection in Fully Vaccinated Healthcare Workers
Source: MDPI journal article supplement (doi:10.3390/diagnostics12092152), 2022-09-04
Supplement: s1 [file s1]

## Article

# Usefulness and Limitations of Anti-S IgG Assay in Detecting Previous SARS-Cov-2 Breakthrough Infection in Fully Vaccinated Healthcare Workers

## SUPPLEMENTARY MATERIAL

**Table S1.** Optimal cut-off of anti-S titer to detect previous BI, as a function of the method used and time window preceding antibody assessment.

| Time window preceding ab assessment | Method | Empirical optimal cutpoint | Sensitivity at cutpoint | Specificity at cutpoint | Area under ROC curve at cut point |
|-------------------------------------|--------|----------------------------|-------------------------|-------------------------|-----------------------------------|
| 180                                 | Liu    | 935                        | 0.68                    | 0.86                    | 0.77                              |
|                                     | Youden | 1035                       | 0.66                    | 0.88                    | 0.77                              |
|                                     | Near   | 935                        | 0.68                    | 0.86                    | 0.77                              |
| 150                                 | Liu    | 935                        | 0.69                    | 0.86                    | 0.77                              |
|                                     | Youden | 1035                       | 0.67                    | 0.88                    | 0.78                              |
|                                     | Near   | 935                        | 0.69                    | 0.86                    | 0.77                              |
| 120                                 | Liu    | 935                        | 0.69                    | 0.86                    | 0.78                              |
|                                     | Youden | 1275                       | 0.64                    | 0.92                    | 0.78                              |
|                                     | Near   | 935                        | 0.69                    | 0.86                    | 0.78                              |
| 90                                  | Liu    | 935                        | 0.70                    | 0.86                    | 0.78                              |
|                                     | Youden | 1275                       | 0.65                    | 0.92                    | 0.78                              |
|                                     | Near   | 935                        | 0.70                    | 0.86                    | 0.78                              |
| 60                                  | Liu    | 935                        | 0.80                    | 0.86                    | 0.83                              |
|                                     | Youden | 935                        | 0.80                    | 0.86                    | 0.83                              |
|                                     | Near   | 935                        | 0.80                    | 0.86                    | 0.83                              |

**Table S2.** Optimal cut-off of anti-S titer time elapsed since vaccination 2<sup>nd</sup> dose, as a function of the method used and time window preceding antibody assessment.

| Time window preceding ab assessment | Method | Empirical optimal cutpoint | Sensitivity at cutpoint | Specificity at cutpoint | Area under ROC curve at cut point |
|-------------------------------------|--------|----------------------------|-------------------------|-------------------------|-----------------------------------|
| 6-193                               | Liu    | 935                        | 0.62                    | 0.84                    | 0.73                              |
|                                     | Youden | 1035                       | 0.55                    | 0.91                    | 0.73                              |
|                                     | Near   | 935                        | 0.62                    | 0.84                    | 0.73                              |
| 194-264                             | Liu    | 1035                       | 0.73                    | 0.90                    | 0.82                              |
|                                     | Youden | 1035                       | 0.73                    | 0.90                    | 0.82                              |
|                                     | Near   | 1035                       | 0.73                    | 0.90                    | 0.82                              |

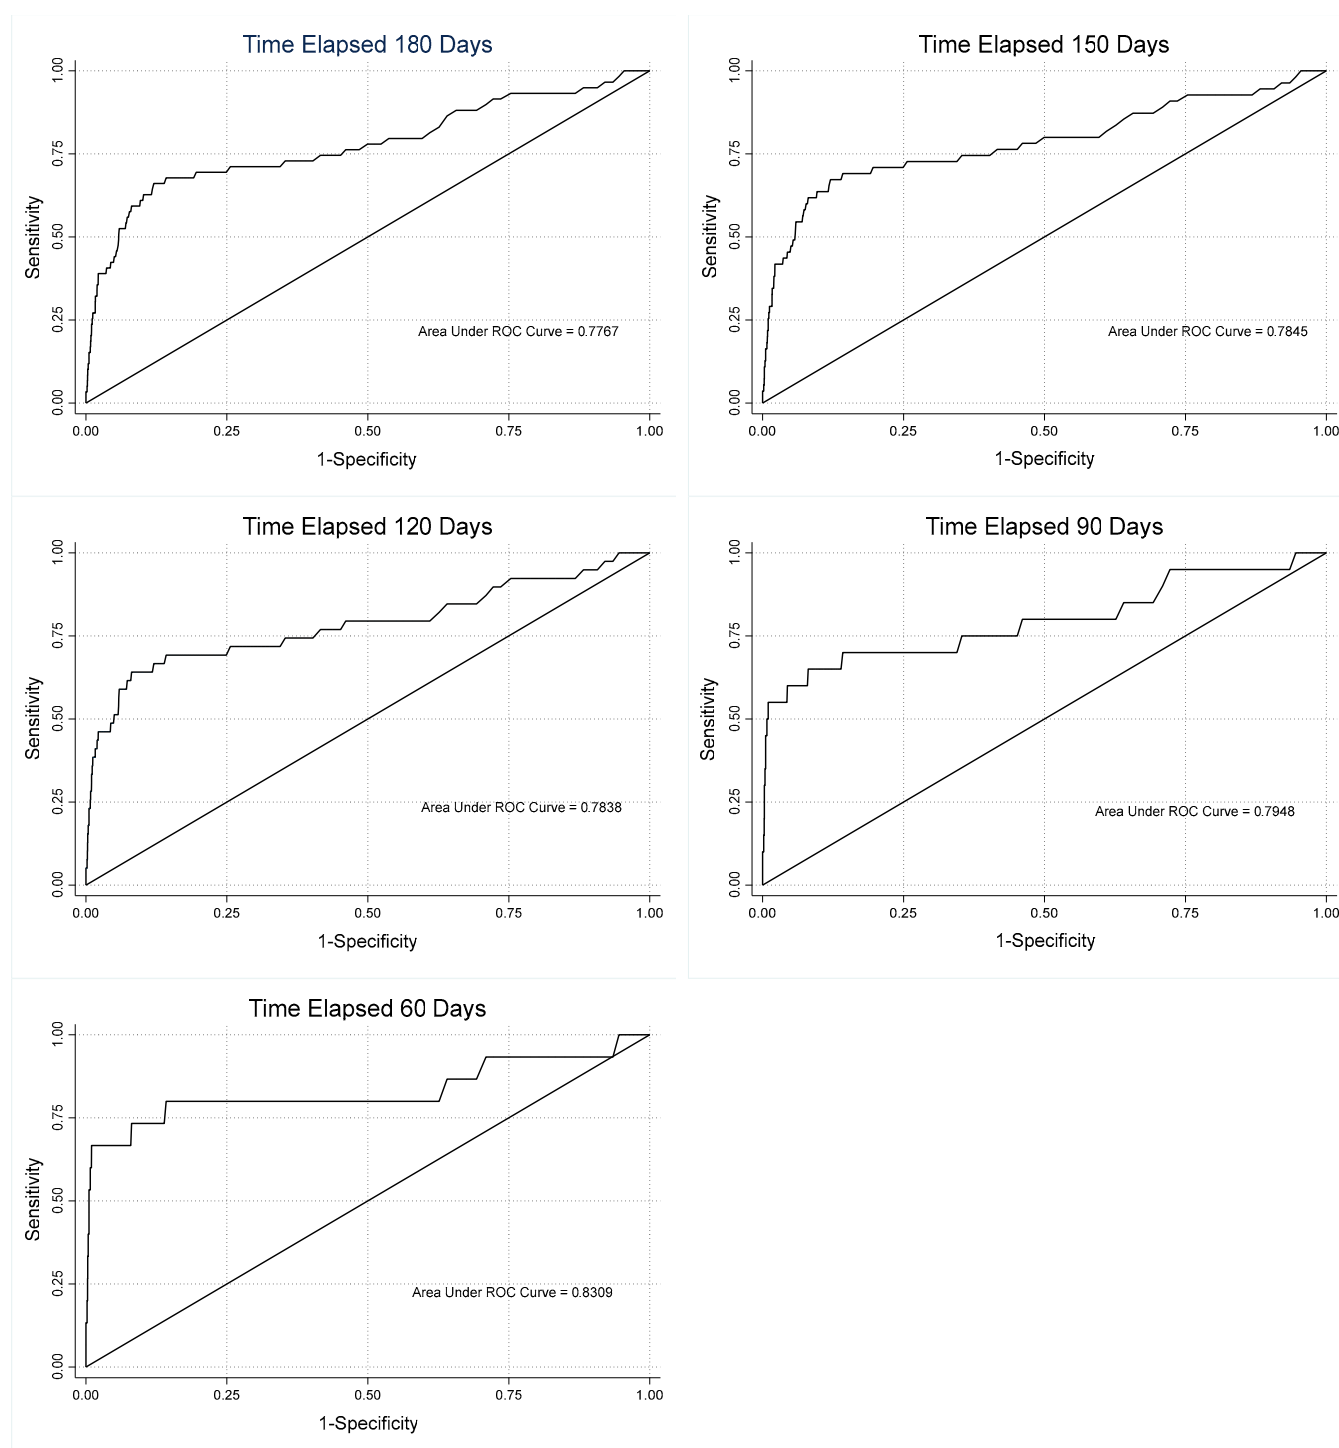

**Figure S1.** ROC curves to predict BI in time windows of 180, 150, 120, 90, 60 days before antibody assessment.

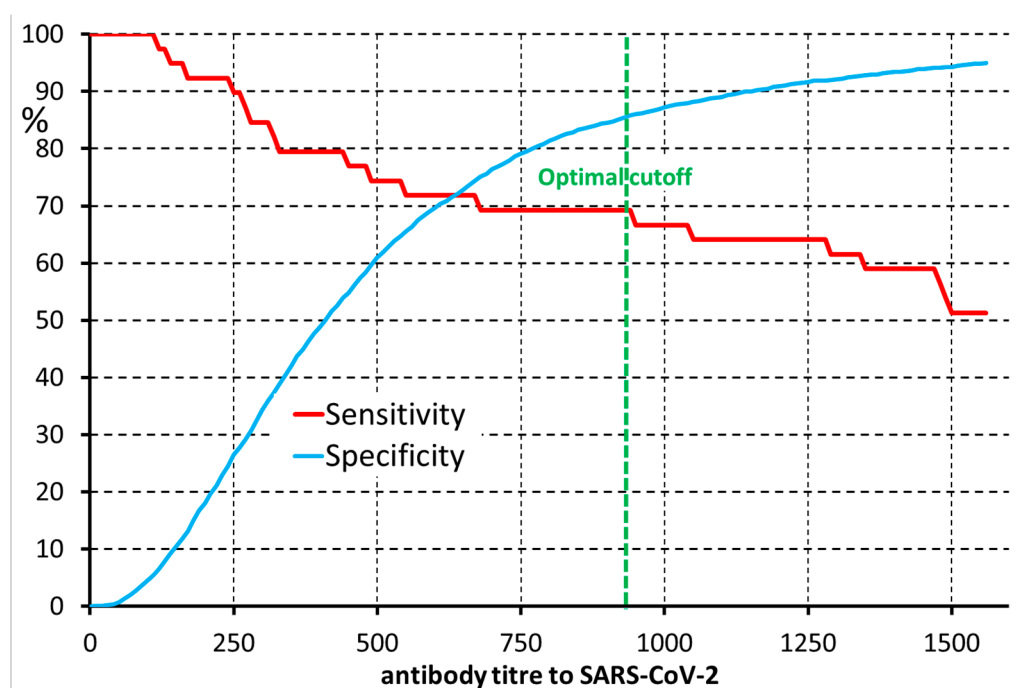

**Figure S2.** Sensitivity and specificity of anti-S IgG in predicting BI in the 120 days preceding antibody assessment.
